# Supplementary material for: Facile template free approach for the large-scale solid phase synthesis of nanocrystalline XIn2S4 (X = Cd/Zn) and its photocatalytic performance for H2 evolution
Source: Royal Society of Chemistry journal article supplement (doi:10.1039/d0nj01323d), 2020-01-01
Supplement: d0nj01323d1.pdf [file d0nj01323d1.pdf]

## Supporting Information

### Facile Template Free Approach for the Large Scale Solid Phase Synthesis of Nanocrystalline $XIn_2S_4$ ( $X=Cd/Zn$ ) and its Photocatalytic Performance for $H_2$ Evolution.

Sonali D. Naik, Sanjay K. Apte,<sup>\*a</sup> Sunil N. Garaje, Yogesh A. Sethi, Manish D. Shinde, Sudhir A. Arbuj, Bharat B. Kale and Ravindra S. Sonawane<sup>\*\*b</sup>

S1

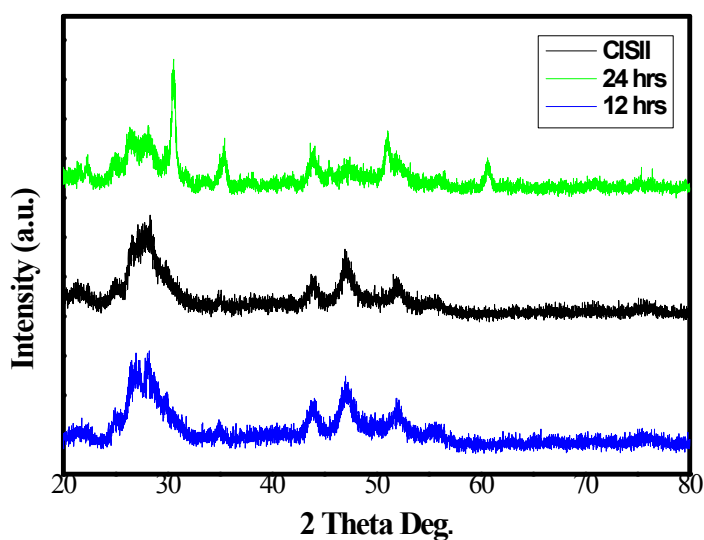

Figure 1: XRD of CIS-II, (a)12 and (b)24 hours duration sample

S2

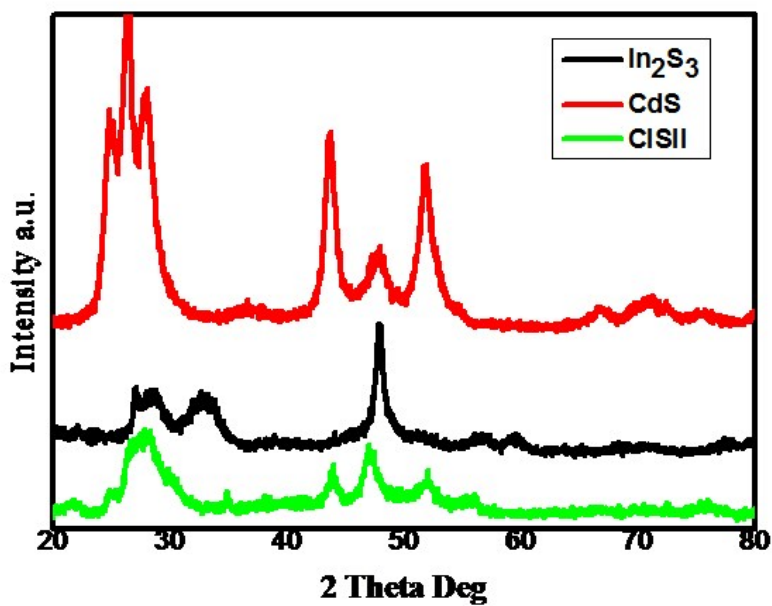

Fig.2 XRD pattern of Cds,  $\text{In}_2\text{S}_3$  and CIS II

### S3 EDAX Analysis:

The composition as verified by EDAX is in good agreement with theoretical values.

| Element | Atomic % $\text{CdIn}_2\text{S}_4$ | Atomic % $\text{ZnIn}_2\text{S}_4$ |
|---------|------------------------------------|------------------------------------|
| Cd      | 15.92                              | ----                               |
| Zn      | ----                               | 9.48                               |
| In      | 30.34                              | 35.48                              |
| S       | 53.74                              | 55.04                              |

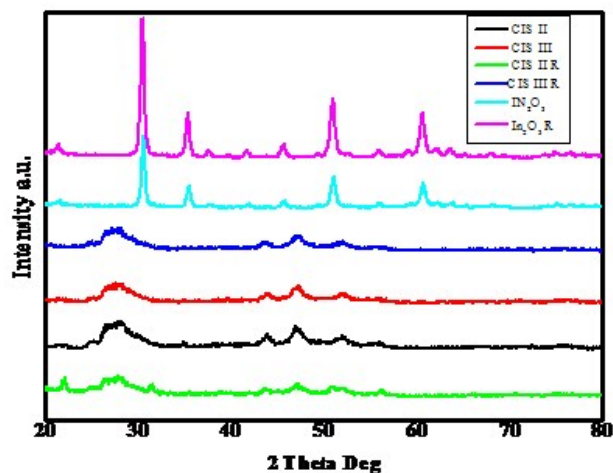

Fig. 4 XRD pattern of Reused Samples

**S5: Comparison of rate of H<sub>2</sub> evolution from H<sub>2</sub>S of nanostructured of previously reported CdIn<sub>2</sub>S<sub>4</sub> and ZnIn<sub>2</sub>S<sub>4</sub>.**

| Photocatalyst                    | H <sub>2</sub> evolution rate             | Reference     |
|----------------------------------|-------------------------------------------|---------------|
| CdIn <sub>2</sub> S <sub>4</sub> | 6476 μmol h <sup>-1</sup> g <sup>-1</sup> | 35            |
| CdIn <sub>2</sub> S <sub>4</sub> | 6960 μmol h <sup>-1</sup> g <sup>-1</sup> | 12            |
| ZnIn <sub>2</sub> S <sub>4</sub> | 8818 μmol h <sup>-1</sup> g <sup>-1</sup> | New Reference |
| ZnIn <sub>2</sub> S <sub>4</sub> | 8748 μmol h <sup>-1</sup> g <sup>-1</sup> | 14            |
| CdIn <sub>2</sub> S <sub>4</sub> | 6085 μmol h <sup>-1</sup> g <sup>-1</sup> | This Work     |
| ZnIn <sub>2</sub> S <sub>4</sub> | 6912 μmol h <sup>-1</sup> g <sup>-1</sup> | This Work     |

**S6: Comparison of rate of H<sub>2</sub> evolution from H<sub>2</sub>O by using similar photocatalyst reported previously.**

| Photocatalyst                                                             | Sacrificial reagent system                                          | H <sub>2</sub> evolution rate | Reference |
|---------------------------------------------------------------------------|---------------------------------------------------------------------|-------------------------------|-----------|
| CdS/CdIn <sub>2</sub> S <sub>4</sub>                                      | 0.35 M Na <sub>2</sub> S+<br>0.25 M Na <sub>2</sub> SO <sub>3</sub> | 823 μmol/h/g                  | 1         |
| CdIn <sub>2</sub> S <sub>4</sub> / graphene                               | 0.35 M Na <sub>2</sub> S+<br>0.25 M Na <sub>2</sub> SO <sub>3</sub> | 713 μmol/h/g                  | 2         |
| TiO <sub>2</sub> /CdIn <sub>2</sub> S <sub>4</sub><br>nanoheterostructure | 0.25 M Na <sub>2</sub> S+<br>0.35 M Na <sub>2</sub> SO <sub>3</sub> | 7.86 mmol/h/g                 | 3         |
| CdIn <sub>2</sub> S <sub>4</sub>                                          | 0.25 M Na <sub>2</sub> S+<br>0.35 M Na <sub>2</sub> SO <sub>3</sub> | 45.18 μmol/h                  | 3         |
| ZnIn <sub>2</sub> S <sub>4</sub>                                          | TEOA                                                                | 13.47 mmol/h/g                | 4         |
| ZnIn <sub>2</sub> S <sub>4</sub> (without Pt loading)                     | 0.25 M Na <sub>2</sub> SO <sub>3</sub> /0.35 M Na <sub>2</sub> S    | 150 μmol/h/g                  | 5         |
| CdIn <sub>2</sub> S <sub>4</sub>                                          | Methanol                                                            | 28.57 μmol/h/g                | This work |
| CdIn <sub>2</sub> S <sub>4</sub>                                          | Benzyl Alcohol                                                      | 33.92 μmol/h/g                | This work |
| ZnIn <sub>2</sub> S <sub>4</sub>                                          | Methanol                                                            | 32.1 μmol/h/g                 | This work |
| ZnIn <sub>2</sub> S <sub>4</sub>                                          | Benzyl Alcohol                                                      | 60.75 μmol/h/g                | This work |

1. A. Meng, B. Zhu, B. Zhong, L. Zhang, B. Cheng, *Appl. Surf. Sci.*, 2017, 422, 518.
2. M. A. Mahadadalkar, S. B. Kale, R. S. Kalubarme, A. P. Bhirud, J. D. Ambekar, S. W. Gosavi, M. V. Kulkarni, C. J. Park, B. B. Kale, *RSC Adv.*, 2016, 6, 34724.
3. Manjiri A. Mahadadalkar, Suresh W. Gosavi, and Bharat B. Kale, *J. Mater. Chem. A*, 2018, 6, 16064-16073
4. Chun Dua, Qian Zhangb, Zhaoyong Lina, Bo Yana, Congxin Xiab, Guowei Yanga, *Applied Catalysis B: Environmental* 248 (2019) 193–201

5. Jie Shen, Jiantao Zai, Yanping Yuan, Xuefeng Qian\*, International Journal of Hydrogen Energy, Volume 37, Issue 22, November 2012, Pages 16986-16993
